# Supplementary material for: Children’s Symptoms with a Febrile Illness and a Positive or Negative Test of SARS-CoV-2 during the Omicron Wave
Source: MDPI journal article supplement (doi:10.3390/children10030419), 2023-02-22
Supplement: s1 [file s1]

**Supplementary Table S1.** Symptomatic comparison of episodes with a positive and negative Corona saliva test during omicron wave

|                       |                                | Negative Corona Test |      | Positive Corona Test |      |          |                       |
|-----------------------|--------------------------------|----------------------|------|----------------------|------|----------|-----------------------|
|                       |                                |                      | N    |                      | N    | p        | t(3130)               |
| <b>Temperature</b>    | Mean (n)                       | 38.7 (2497)          | 3132 | 38.6 (635)           | 3132 | <0.001** | 3.736                 |
|                       | SD                             | 0.85                 |      | 0.84                 |      |          |                       |
|                       | Median                         | 38.7                 |      | 38.6                 |      |          |                       |
|                       | Min                            | 35.6                 |      | 34.3                 |      |          |                       |
|                       | Max                            | 41.8                 |      | 41.1                 |      |          |                       |
| <b>Max. Temp.</b>     | Mean (n)                       | 38.9 (2497)          | 3132 | 38.9 (635)           | 3132 | 0.979    | -0.027                |
|                       | SD                             | 0.92                 |      | 0.93                 |      |          |                       |
|                       | Median                         | 39.0                 |      | 39.0                 |      |          |                       |
|                       | Min                            | 35.6                 |      | 34.3                 |      |          |                       |
|                       | Max                            | 41.8                 |      | 41.1                 |      |          |                       |
|                       |                                | % (n)                | N    | % (n)                | N    | p        | Odds ratio            |
| <b>Fever (38.5°C)</b> |                                | 70.1%                | 2497 | 72.30% (459)         | 635  | 0.278    | 1.113 [0.917 – 1.351] |
| <b>Symptom</b>        | <b>Any symptom</b>             | 82.5% (2080)         | 2521 | 80.9% (513)          | 634  | 0.349    | 0.899 [0.719 - 1.124] |
|                       | Cough                          | 45.0% (1134)         |      | 60.7% (385)          |      | <0.001** | 1.891 [1.583 – 2.259] |
|                       | Constrained breathing          | 22.9% (578)          |      | 24.1% (153)          |      | 0.520    | 1.069 [0.872 – 1.312] |
|                       | Freezing/Chills                | 14.9% (376)          |      | 16.4% (104)          |      | 0.351    | 1.119 [0.883 – 1.419] |
|                       | Fatigue                        | 61.2% (1541)         |      | 68.9% (437)          |      | <0.001** | 1.411 [1.171 – 1.700] |
|                       | Smell/taste disturbed          | 0.7% (17)            |      | 3.2% (20)            |      | <0.001** | 4.798 [2.498 – 9.214] |
|                       | Mucus                          | 41.5% (1047)         |      | 39.1% (248)          |      | 0.269    | 0.905 [0.757 – 1.081] |
|                       | Tonsillitis                    | 2.1% (54)            |      | 0.6% (4)             |      | 0.017*   | 0.290 [0.105 – 0.804] |
|                       | Joint swelling                 | 0.2% (6)             |      | 0.3% (2)             |      | 0.730    | 1.326 [0.267 – 6.588] |
|                       | Teething                       | 17.7% (447)          |      | 12.9% (82)           |      | 0.004*   | 0.689 [0.535 – 0.888] |
|                       | Something else                 | 7.5% (188)           |      | 7.6% (48)            |      | 0.923    | 1.016 [0.731 – 1.413] |
|                       | <b>Any pain symptom</b>        | 39.9% (811)          | 2035 | 33.0% (172)          | 521  | 0.004*   | 0.744 [0.607 – 0.911] |
| <b>Pain</b>           | Pain in the limbs              | 15.4% (314)          |      | 22.8% (119)          |      | <0.001** | 1.622 [1.280 – 2.057] |
|                       | Headache                       | 17.9% (364)          |      | 21.1% (110)          |      | 0.091    | 1.229 [0.967 – 1.560] |
|                       | Sore throat                    | 16.1% (328)          |      | 21.1% (110)          |      | 0.007*   | 1.393 [1.094 – 1.773] |
|                       | Pain in the ears               | 6.4% (131)           |      | 2.7% (14)            |      | <0.001** | 0.401 [0.229 – 0.702] |
|                       | Stomach ache                   | 14.3% (290)          |      | 14.4% (75)           |      | 0.933    | 1.012 [0.769 – 1.331] |
|                       | Somewhere else                 | 9.4% (192)           |      | 7.3% (38)            |      | 0.128    | 0.755 [0.526 – 1.085] |
|                       | <b>Any warning sign</b>        | 11.8% (291)          | 2466 | 9.7% (60)            | 616  | 0.151    | 0.807 [0.602 – 1.081] |
| <b>Warning Sign</b>   | Touch sensitivity              | 3.8% (94)            |      | 6.8% (42)            |      | <0.001** | 1.846 [1.269 – 2.687] |
|                       | Shrill screaming               | 5.0% (124)           |      | 6.3% (39)            |      | 0.196    | 1.277 [0.881 – 1.850] |
|                       | Apathy                         | 4.8% (118)           |      | 4.2% (26)            |      | 0.553    | 0.877 [0.568 – 1.354] |
|                       | Seems seriously sick           | 9.9% (244)           |      | 13.0% (80)           |      | 0.025*   | 1.359 [1.038 – 1.780] |
|                       | Neck stiffness                 | 2.8% (10)            | 356  | 0.9% (1)             | 107  | 0.470†   | 0.326 [0.041 – 2.579] |
| <b>Rash</b>           | Rash                           | 6.9% (172)           | 2498 | 3.3% (21)            | 635  | <0.001** | 0.463 [0.291 – 0.734] |
| <b>Diarrhea</b>       | Diarrhea                       | 16.5% (417)          | 2522 | 19.2% (123)          | 639  | 0.103    | 1.203 [0.963 – 1.504] |
| <b>Dehydration</b>    | <b>Any sign of dehydration</b> | 10.4% (258)          | 2472 | 8.1% (51)            | 626  | 0.088    | 0.761 [0.556 – 1.042] |
|                       | Dry mucous                     | 1.9% (46)            |      | 3.0% (19)            |      | 0.070    | 1.651 [0.960 – 2.838] |
|                       | Dry Skin                       | 1.0% (24)            |      | 1.4% (9)             |      | 0.313    | 1.488 [0.688 – 3.217] |
|                       | Tiredness                      | 12.5% (310)          |      | 11.0% (69)           |      | 0.301    | 0.864 [0.655 – 1.140] |
|                       | Sunken eye sockets             | 1.6% (40)            |      | 2.6% (16)            |      | 0.119    | 1.595 [0.887 – 2.867] |

|                      |            |           |        |                       |
|----------------------|------------|-----------|--------|-----------------------|
| Less wet diapers     | 5.9% (147) | 7.3% (46) | 0.195  | 1.254 [0.890 – 1.768] |
| Fontanelle is sunken | 0.2% (5)   | 0.6% (4)  | 0.088† | 3.173 [0.850 – 1.851] |

Note: p-Value based on a X<sup>2</sup>-Test with a significance level of 5%; \* < 0.05; \*\* p < 0.001; †= p-value based on exact fisher test

**Supplementary Table S2.** Significant differences in symptoms between different age groups with a positive Corona saliva test during the omicron wave

|                  | 0-2 years    | 3-5 years    | 6-17 years  |                          |        |                         |
|------------------|--------------|--------------|-------------|--------------------------|--------|-------------------------|
|                  | % (n)        | % (n)        | % (n)       |                          | p      | Odds ratio              |
| Fever            | 71.47% (268) | 77.84% (144) | 62.67% (47) | 0-2 years vs. 3-5 years  | -      | -                       |
|                  |              |              |             | 0-2 years vs. 6-17 years | -      | -                       |
|                  |              |              |             | 6-17 years vs. 3-5 years | 0.013  | 2.092 [1.169 – 3.746]   |
| Symptoms         |              |              |             |                          |        |                         |
| Cough            | 63.7% (237)  | 59.9% (109)  | 48.8% (39)  | 0-2 years vs. 3-5 years  | -      | -                       |
|                  |              |              |             | 0-2 years vs. 6-17 years | 0.014  | 0.542 [0.333 – 0.882]   |
|                  |              |              |             | 6-17 years vs. 3-5 years | -      | -                       |
| Const. breathing | 29.8% (111)  | 18.1 % (33)  | 11.3% (9)   | 0-2 years vs. 3-5 years  | 0.003  | 0.521 [0.336 – 0.807]   |
|                  |              |              |             | 0-2 years vs. 6-17 years | 0.001  | 0.298 [0.144 - 0.617]   |
|                  |              |              |             | 6-17 years vs. 3-5 years | -      | -                       |
| Freezing/Chills  | 9.14% (34)   | 19.23% (35)  | 43.75% (35) | 0-2 years vs. 3-5 years  | <0.001 | 2.367 [1.421 – 3.942]   |
|                  |              |              |             | 0-2 years vs. 6-17 years | <0.001 | 7.732 [4.394 – 13.607]  |
|                  |              |              |             | 6-17 years vs. 3-5 years | <0.001 | 0.306 [0.172 – 0.544]   |
| Teething         | 21.24% (79)  | 1.10% (2)    | 1.25% (1)   | 0-2 years vs. 3-5 years  | <0.001 | 0.041 [0.010 – 0.170]   |
|                  |              |              |             |                          |        |                         |
|                  |              |              |             | 0-2 years vs. 6-17 years | 0.003  | 0.047 [0.006 – 0.343]   |
|                  |              |              |             | 6-17 years vs. 3-5 years | -      | -                       |
| Other symptoms   | 6.5% (24)    | 6.0% (11)    | 16.3% (13)  | 0-2 years vs. 3-5 years  | -      | -                       |
|                  |              |              |             | 0-2 years vs. 6-17 years | 0.005  | 2.813 [1.364 – 5.802]   |
|                  |              |              |             | 6-17 years vs. 3-5 years | 0.011  | 0.332 [0.142 – 0.777]   |
| Pain symptoms    |              |              |             |                          |        |                         |
| Any pain symp.   | 28.52% (77)  | 29.82% (51)  | 55.0% (44)  | 0-2 years vs. 3-5 years  | -      | -                       |
|                  |              |              |             | 0-2 years vs. 6-17 years | <0.001 | 3.063 [1.833 – 5.120]   |
|                  |              |              |             | 6-17 years vs. 3-5 years | <0.001 | 0.348 [0.201 – 0.602]   |
| Headache         | 11.11% (30)  | 17.54% (30)  | 62.5% (50)  | 0-2 years vs. 3-5 years  | -      | -                       |
|                  |              |              |             | 0-2 years vs. 6-17 years | <0.001 | 13.333 [7.386 – 24.070] |
|                  |              |              |             | 6-17 years vs. 3-5 years | <0.001 | 0.128 [0.070 – 0.233]   |
| Sore throat      | 19.63% (53)  | 17.54% (30)  | 33.75% (27) | 0-2 years vs. 3-5 years  | -      | -                       |
|                  |              |              |             | 0-2 years vs. 6-17 years | 0.009  | 2.086 [1.201 – 3.623]   |
|                  |              |              |             | 6-17 years vs. 3-5 years | 0.005  | 0.418 [0.227 – 0.767]   |
| Stomach ache     | 7.41% (29)   | 20.47% (35)  | 25% (20)    | 0-2 years vs. 3-5 years  | <0.001 | 3.217 [1.787 – 5.790]   |
|                  |              |              |             | 0-2 years vs. 6-17 years | <0.001 | 4.167 [2.109 – 8.231]   |
|                  |              |              |             | 6-17 years vs. 3-5 years | -      | -                       |
| Warning signs    |              |              |             |                          |        |                         |
| Any Warn. sign   | 13.46% (49)  | 4.60% (8)    | 3.85% (3)   | 0-2 years vs. 3-5 years  | 0.003  | 0.310 [0.143 – 0.670]   |
|                  |              |              |             | 0-2 years vs. 6-17 years | 0.026  | 0.257 [0.078 – 0.847]   |
|                  |              |              |             | 6-17 years vs. 3-5 years | -      | -                       |
| Shrill screaming | 9.62% (35)   | 2.30% (4)    | 0% (0)      | 0-2 years vs. 3-5 years  | 0.005  | 0.221 [0.077 - 0.633]   |
|                  |              |              |             | 0-2 years vs. 6-17 years | -      | -                       |
|                  |              |              |             | 6-17 years vs. 3-5 years | -      | -                       |
| Diarrhea         | 19.40% (73)  | 14.80% (27)  | 28.75% (23) | 0-2 years vs. 3-5 years  | -      | -                       |
|                  |              |              |             | 0-2 years vs. 6-17 years | -      | -                       |
|                  |              |              |             | 6-17 years vs. 3-5 years | 0.009  | 0.432 [0.229 – 0.813]   |

Note: p-Value based on a X<sup>2</sup>-Test with a significance level of 5%

**Supplementary Table S3.** Significant differences in symptoms with a positive and negative Corona saliva test within age groups during the omicron wave

|                       | Negative Corona Test |      | Positive Corona Test |     |         |                        |
|-----------------------|----------------------|------|----------------------|-----|---------|------------------------|
| 0-2 years             | % (n)                | N    | % (n)                | N   | p *     | Odds ratio [95% CI]    |
| Cough                 | 42.6% (518)          | 1216 | 63.70% (237)         | 372 | <0.001  | 2.366 [1.861 – 3.007]  |
| Fatigue               | 60.8% (739)          | 1216 | 69.4% (258)          | 372 | 0.003   | 1.461 [1.139 – 1.873]  |
| Smell/Taste disturbed | 0.3% (4)             | 1216 | 2.4% (9)             | 372 | <0.001† | 7.512 [2.300 – 24.537] |
| Teething              | 33.6% (409)          | 1216 | 21.2% (79)           | 372 | <0.001  | 0.532 [0.404 – 0.701]  |
| Pain in the limbs     | 12.7% (102)          | 804  | 22.2% (60)           | 270 | <0.001  | 1.966 [1.380 – 2.802]  |
| Sore throat           | 12.1% (97)           | 804  | 19.6% (53)           | 270 | 0.002   | 1.780 [1.232 – 2.571]  |
| Pain in the ears      | 6.1% (49)            | 804  | 2.6% (7)             | 270 | 0.030   | 0.410 [0.183 – 0.917]  |
| Pain somewhere else   | 13.8% (111)          | 804  | 8.1% (22)            | 270 | 0.016   | 0.554 [0.343 – 0.895]  |
| Seems seriously sick  | 9.9% (118)           | 1194 | 15.7% (57)           | 364 | 0.002   | 1.693 [1.204 – 2.380]  |
| Rash                  | 9.0% (108)           | 1206 | 4.2% (16)            | 377 | 0.004   | 0.451 [0.263 – 0.772]  |
| <b>3-5 years</b>      |                      |      |                      |     |         |                        |
| Cough                 | 48.5% (486)          | 1002 | 59.9% (109)          | 182 | 0.005   | 1.585 [1.150 – 2.186]  |
| Smell/Taste disturbed | 0.9% (9)             | 1002 | 3.3% (6)             | 182 | 0.018†  | 3.761 [1.322 – 10.699] |
| Any pain symptom      | 37.8% (352)          | 931  | 29.8% (51)           | 171 | 0.047   | 0.699 [0.491 – 0.995]  |
| Any warning sign      | 10.0% (98)           | 978  | 4.6% (8)             | 174 | 0.026   | 0.433 [0.207 – 0.907]  |
| Touch sensitivity     | 3.5% (34)            | 978  | 8.0% (14)            | 174 | 0.007   | 2.429 [1.275 – 4.628]  |
| Rash                  | 5.2% (52)            | 995  | 1.1% (2)             | 178 | 0.011†  | 0.206 [0.050 – 0.854]  |
| Sunken eye sockets    | 0.9% (9)             | 987  | 2.8% (5)             | 178 | 0.042   | 3.141 [1.040 – 9.483]  |
| <b>6-17 years</b>     |                      |      |                      |     |         |                        |
| Tiredness             | 16.3% (48)           | 295  | 6.3% (5)             | 79  | 0.028†  | 0.348 [0.134 – 0.905]  |
| Freezing/Chills       | 27.1% (82)           | 303  | 43.8% (35)           | 80  | 0.004   | 2.096 [1.260 – 3.488]  |
| Smell/Taste disturbed | 1.3% (4)             | 303  | 6.3% (5)             | 80  | 0.022†  | 4.983 [1.306 – 19.011] |
| Diarrhea              | 15.9% (48)           | 302  | 28.7% (23)           | 80  | 0.010   | 2.135 [1.203 – 3.791]  |
| Headache              | 50.0% (150)          | 300  | 62.5% (50)           | 80  | 0.048   | 1.667 [1.005 – 2.765]  |

Note: \*=p-Values based on X<sup>2</sup>-Test; †= p-Values based on the exact fisher Test
